# Supplementary material for: Towards highly efficient thermally activated delayed fluorescence devices through a trap-assisted recombination mechanism and reduced interfacial exciton annihilation
Source: Royal Society of Chemistry journal article supplement (doi:10.1039/c7tc00653e), 2017-01-01
Supplement: c7tc00653e1.pdf [file c7tc00653e1.pdf]

# Towards Highly Efficient Thermally Activated Delayed Fluorescence Devices through a Trap-assisted Recombination Mechanism and Reduced Interfacial Excitons Annihilation

Wenzhi Zhang, Jiangjiang Jin, Zhi Huang, Xialei Lv, Shaoqing Zhuang, Lei Wang\*

Wuhan National Laboratory for Optoelectronics, Huazhong University of Science and Technology,

Wuhan, 430074, P. R. China

\*E-mail: wanglei@mail.hust.edu.cn

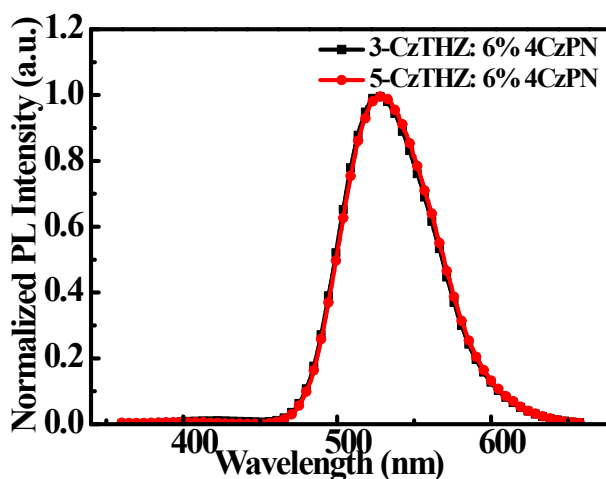

Fig. S1 The PL spectra of doped films for 3-CzTHZ : 6 wt% 4CzPN and 5-CzTHZ : 6 wt% 4CzPN.

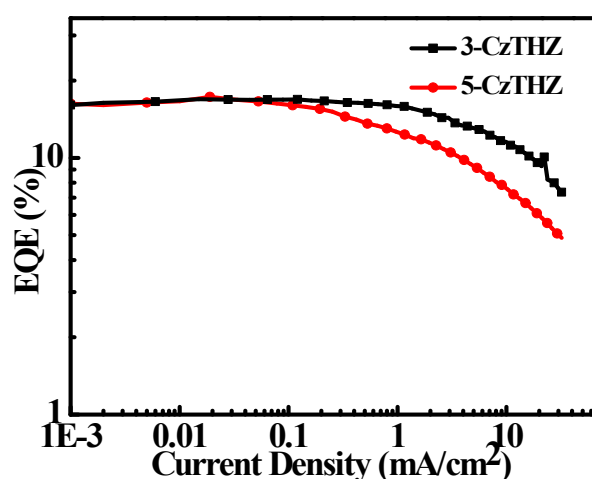

Fig. S2 EQE-current density properties of devices A and B hosted by 3-CzTHZ and 5-CzTHZ, respectively.

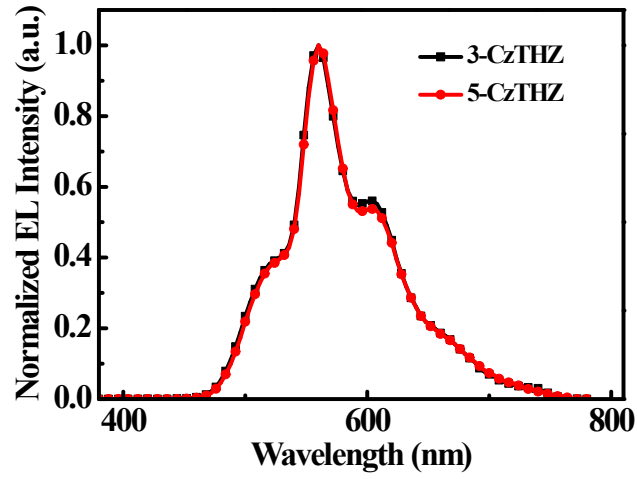

Fig. S3 EL spectra of two devices by inserting an ultrathin  $(\text{fbi})_2\text{Ir}(\text{acac})$  sensor layer closed to the ETL side.

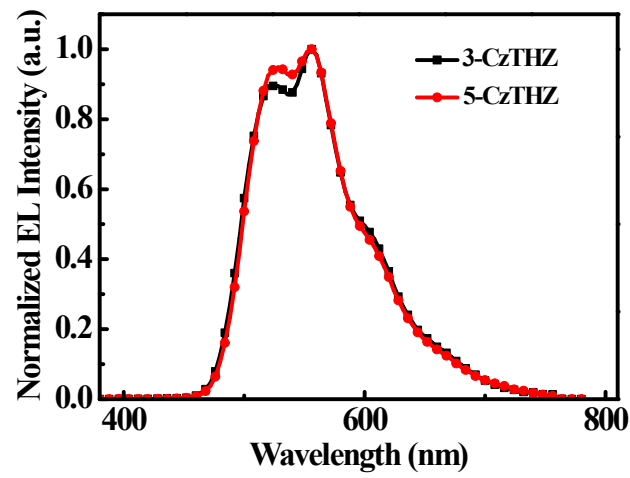

Fig. S4 EL spectra of two devices by inserting an ultrathin  $(\text{fbi})_2\text{Ir}(\text{acac})$  sensor layer in the middle of the EML.
